# Supplementary material
Source: Springer Nature journal article supplement (https://www.springermedizin.de/resource/supplementary/12992_2010_81_MOESM5_ESM.pdf/9616464)

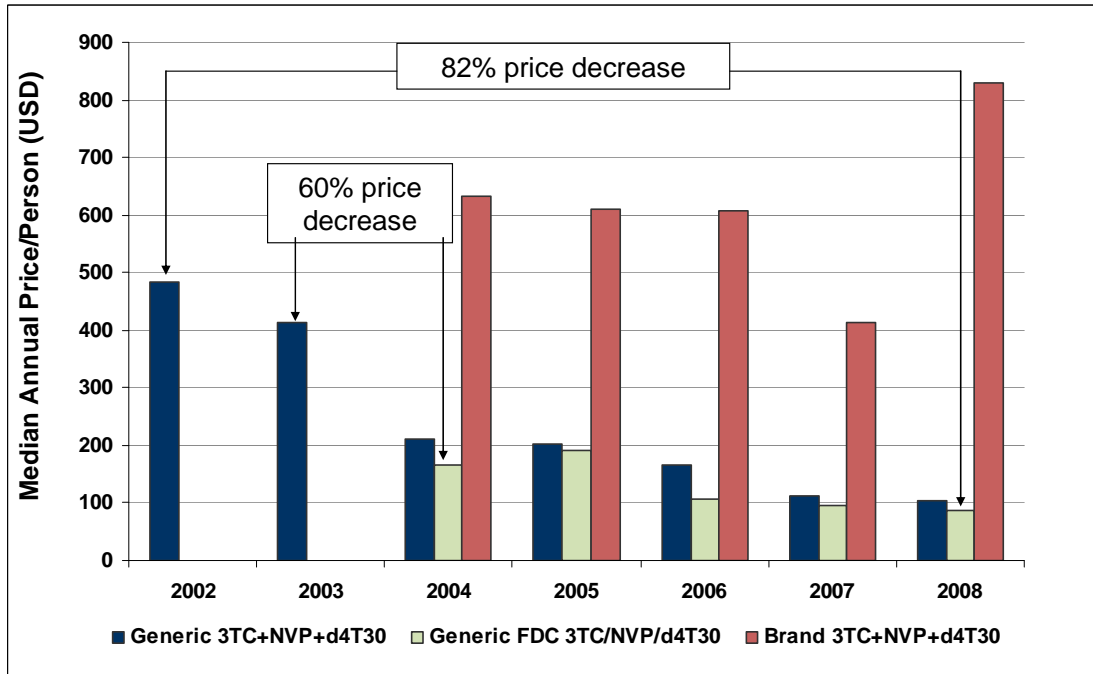

5a

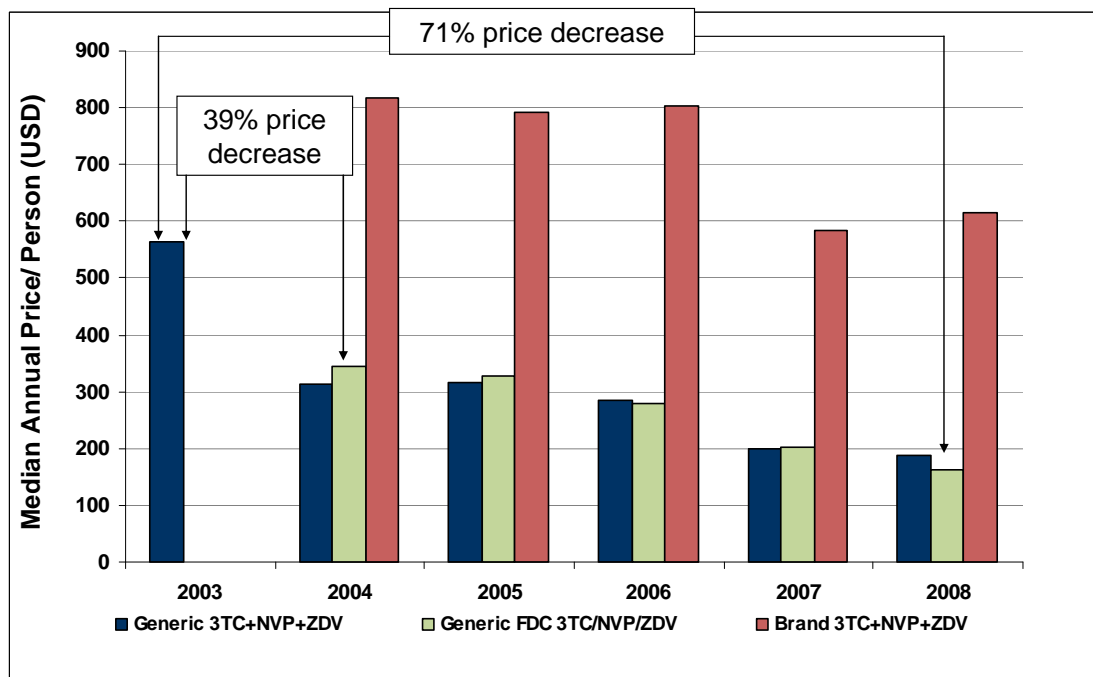

5b

Supplement: MOESM5 [file 9616464]
